# Supplementary material for: CeNiO3 perovskite nanoparticles synthesized using gelatin as a chelating agent for CO2 dry reforming of methane
Source: Royal Society of Chemistry journal article supplement (doi:10.1039/d4su00268g), 2024-01-01
Supplement: d4su00268g1.pdf [file d4su00268g1.pdf]

## CeNiO<sub>3</sub> perovskite nanoparticles using gelatin as a chelating agent for CO<sub>2</sub> dry reforming of methane.

Usman Zahid<sup>a</sup>, Wahid Sidik Sarifuddin<sup>a</sup>, Abdul Hanif Mahadi<sup>a</sup>, Holilah<sup>b</sup>, Didik Prasetyoko<sup>c</sup>, Hasliza Bahruji<sup>a\*</sup>

Supplementary documents

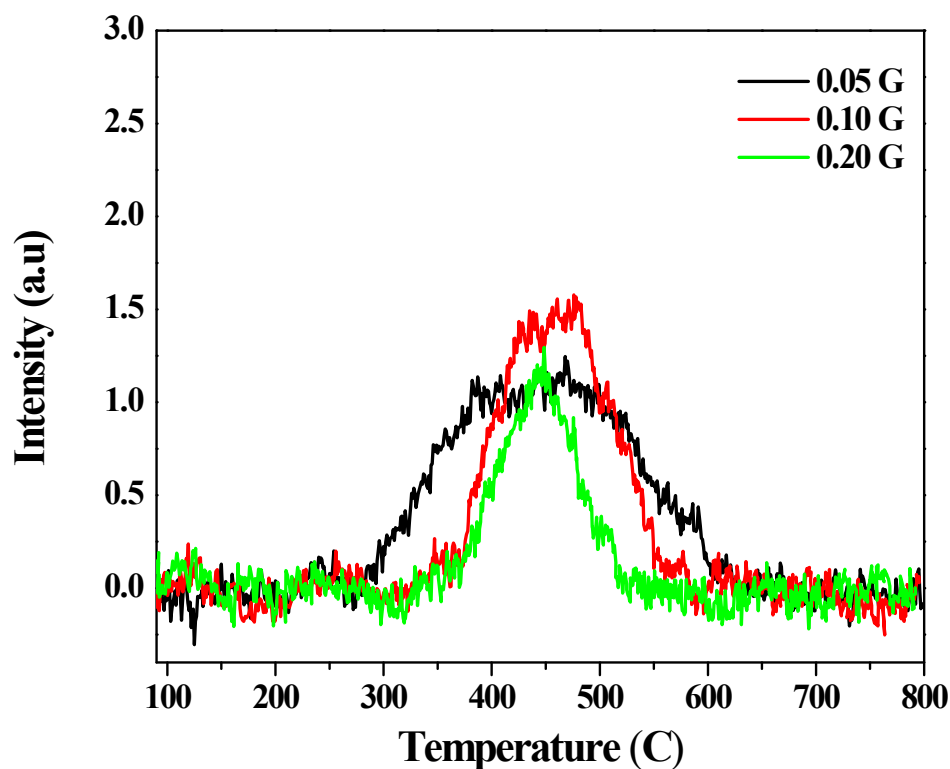

Figure S1 – TPO of fresh CeNiO<sub>3</sub> catalysts synthesized using 0.05g, 0.1g and 0.2g gelatin.

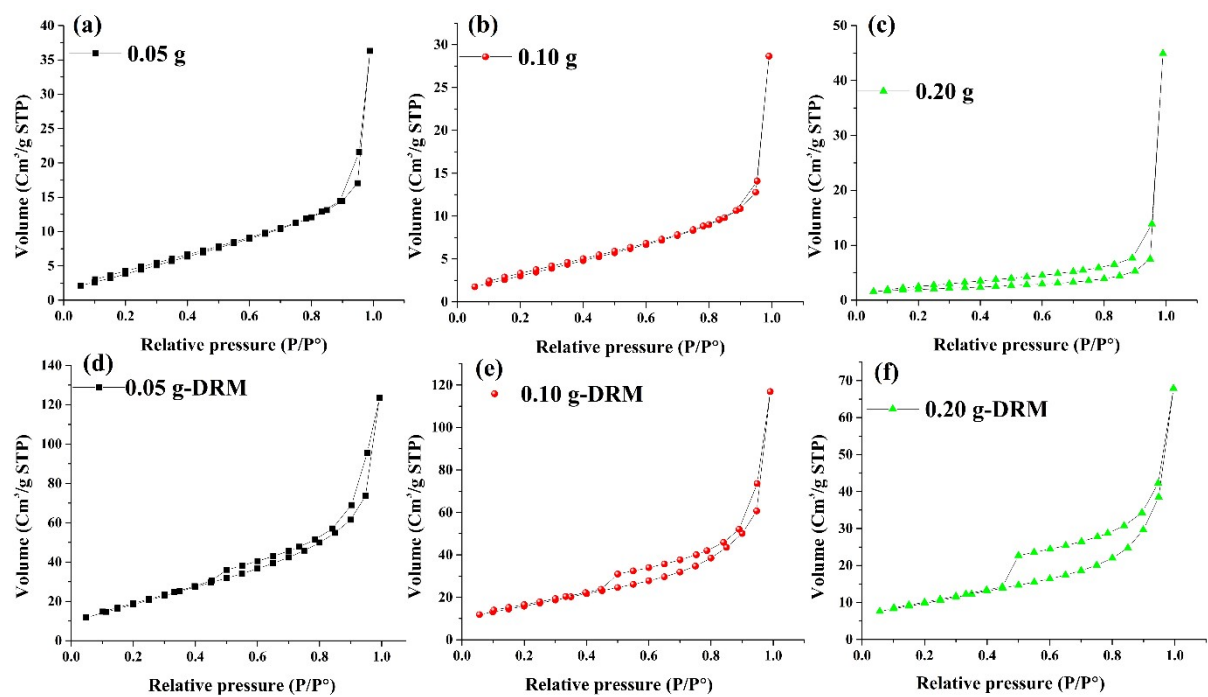

Fig S2. N<sub>2</sub> adsorption-desorption isotherms of CeNiO<sub>3</sub> Perovskites synthesized using 0.05g, 0.1g and 0.2g gelatin; after calcination (a, b, c) and after 24h dry reforming reaction at 600°C (d, e, f).

## CO<sub>2</sub> Temperature programmed desorption

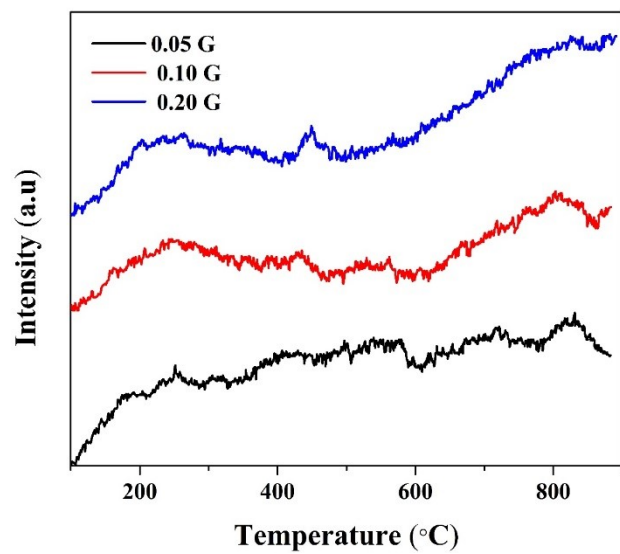

Fig S3. CO<sub>2</sub>-TPD profiles of CeNiO<sub>3</sub> perovskites synthesized using 0.05g, 0.1g and 0.2g gelatin.

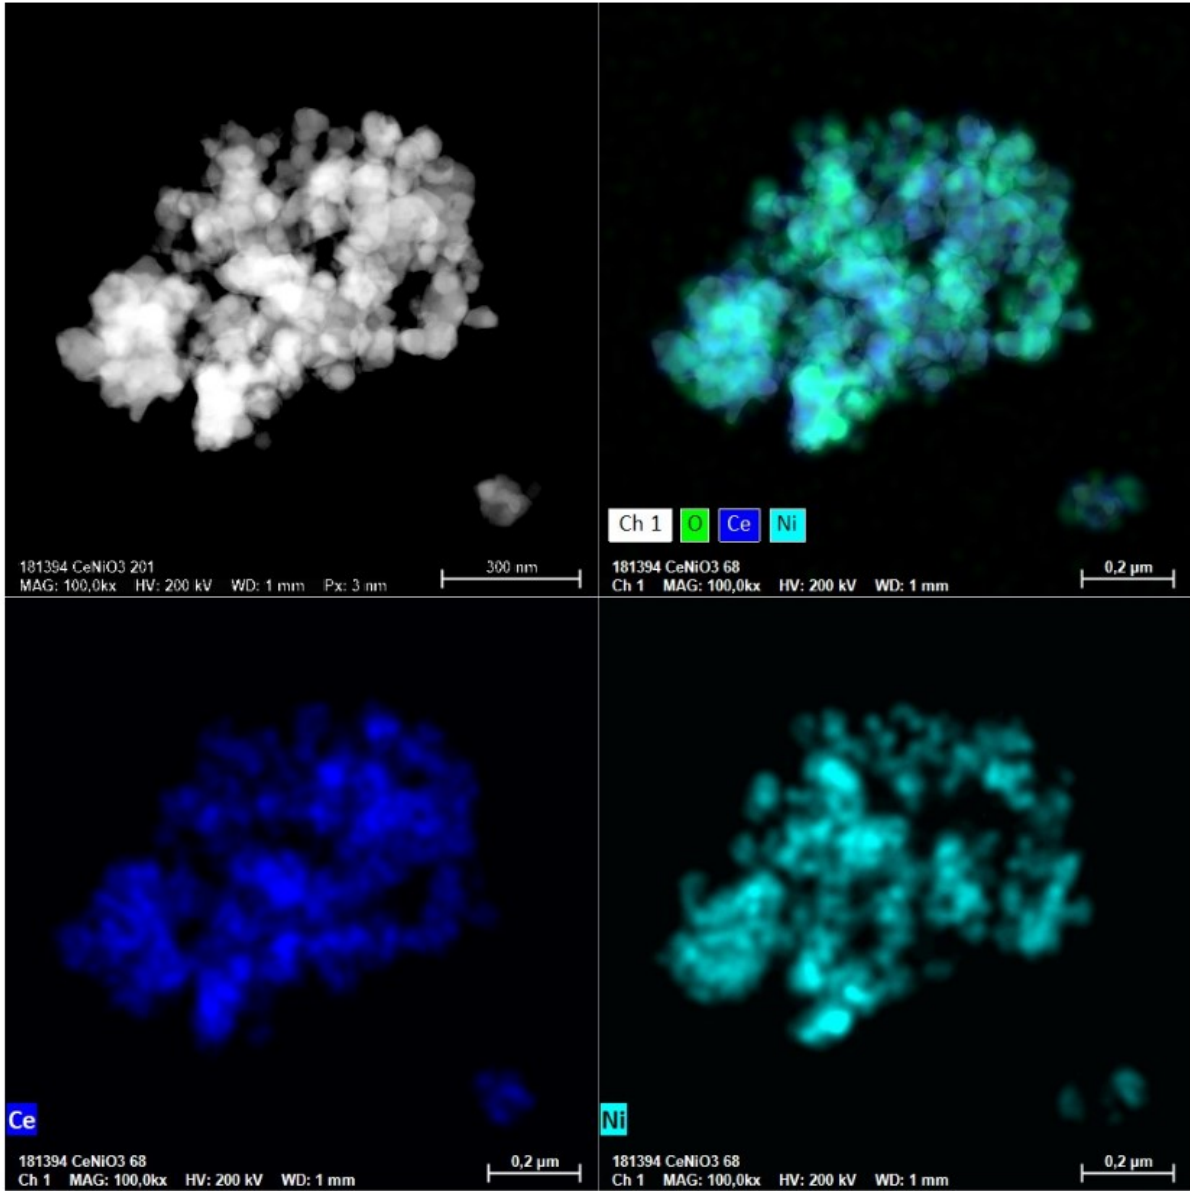

Fig S4. EDX analysis of CeNiO<sub>3</sub> perovskites synthesized 0.2g gelatin.
